# Supplementary material for: The removal mechanism and performance of tetrabromobisphenol A with a novel multi-group activated carbon from recycling long-root Eichhornia crassipes plants
Source: Royal Society of Chemistry journal article supplement (doi:10.1039/c9ra03374b), 2019-01-01
Supplement: c9ra03374b1.pdf [file c9ra03374b1.pdf]

## Supporting information

Table S1 The proportions of functional groups both in C1s and O1s peak.

| Peak | Functional groups     | Proportion/% |
|------|-----------------------|--------------|
| C1s  | C-C in aromatic rings | 51.4         |
|      | C-C=O                 | 34.2         |
|      | C-O                   | 6.8          |
|      | O-C=O                 | 7.5          |
| O1s  | C-O                   | 57.1         |
|      | C-OH                  | 42.9         |

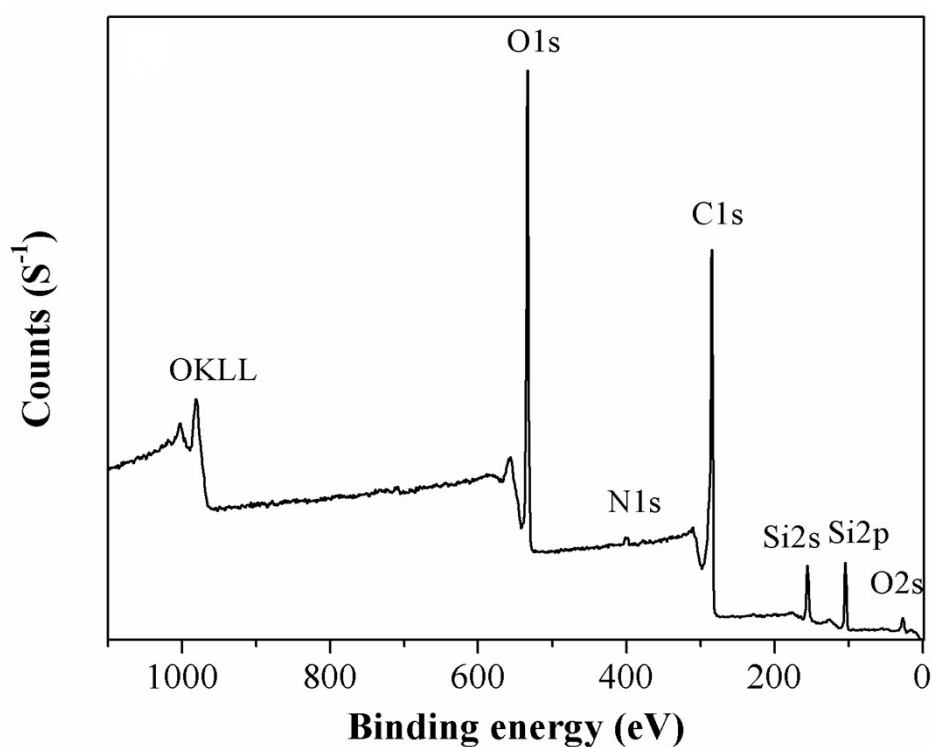

Fig. S1 Wide XPS spectrum of the MFAC.

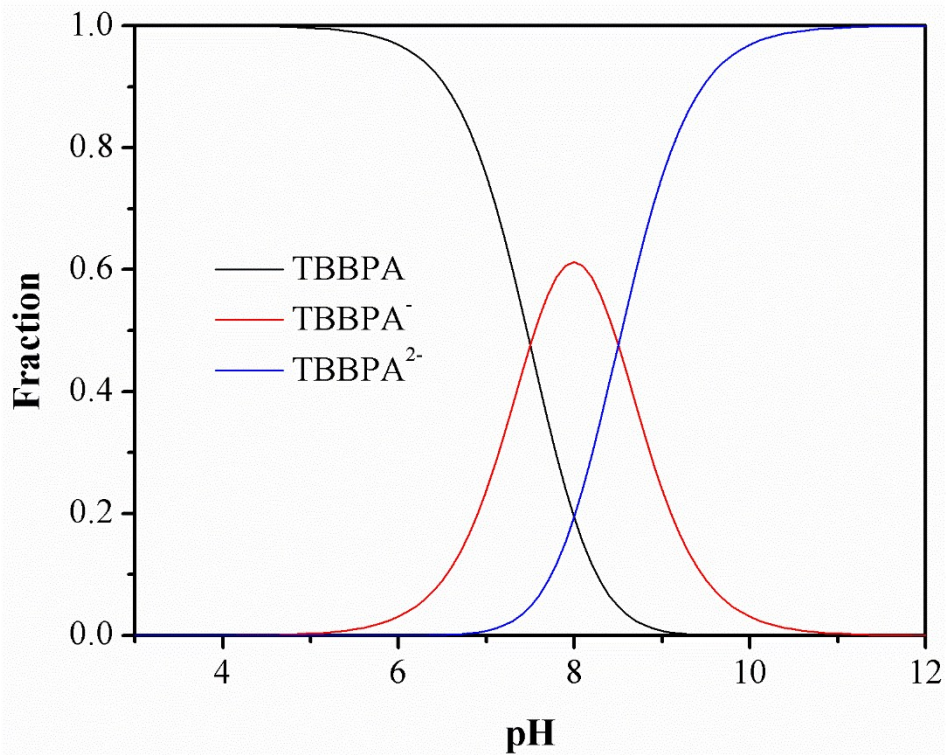

Fig. S2 Species distribution of TBBPA as a function of pH values.

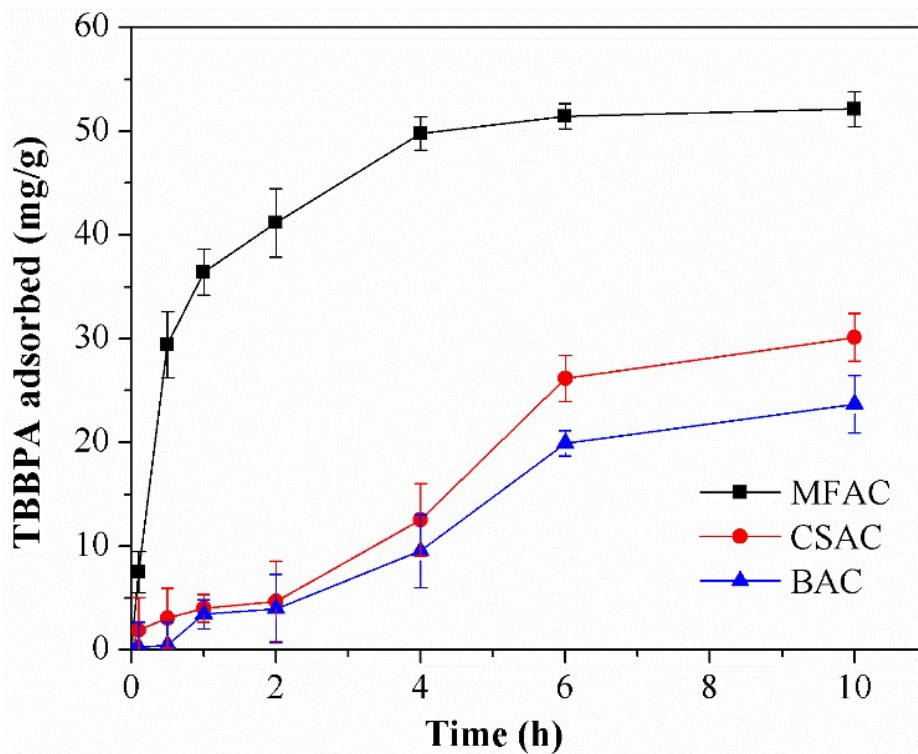

Fig. S3 Adsorption on TBBPA by different activated carbons (TBBPA = 10 mg/L, MFAC, commercial coconut shell activated carbon and bamboo activated carbon = 150.0 mg/L, T = 30 °C, pH = 9.0, t = 10 h).
